# Supplementary material
Source: PubMed Central journal article supplement (PMC7122012)

Supplemental Figure 1. Additional patient images and scores of mycosis fungoides patches and plaques treated with low-dose radiation in lesions that showed a complete response (CR), partial response (PR) or stable disease (SD). mCAILS displayed underneath photo.

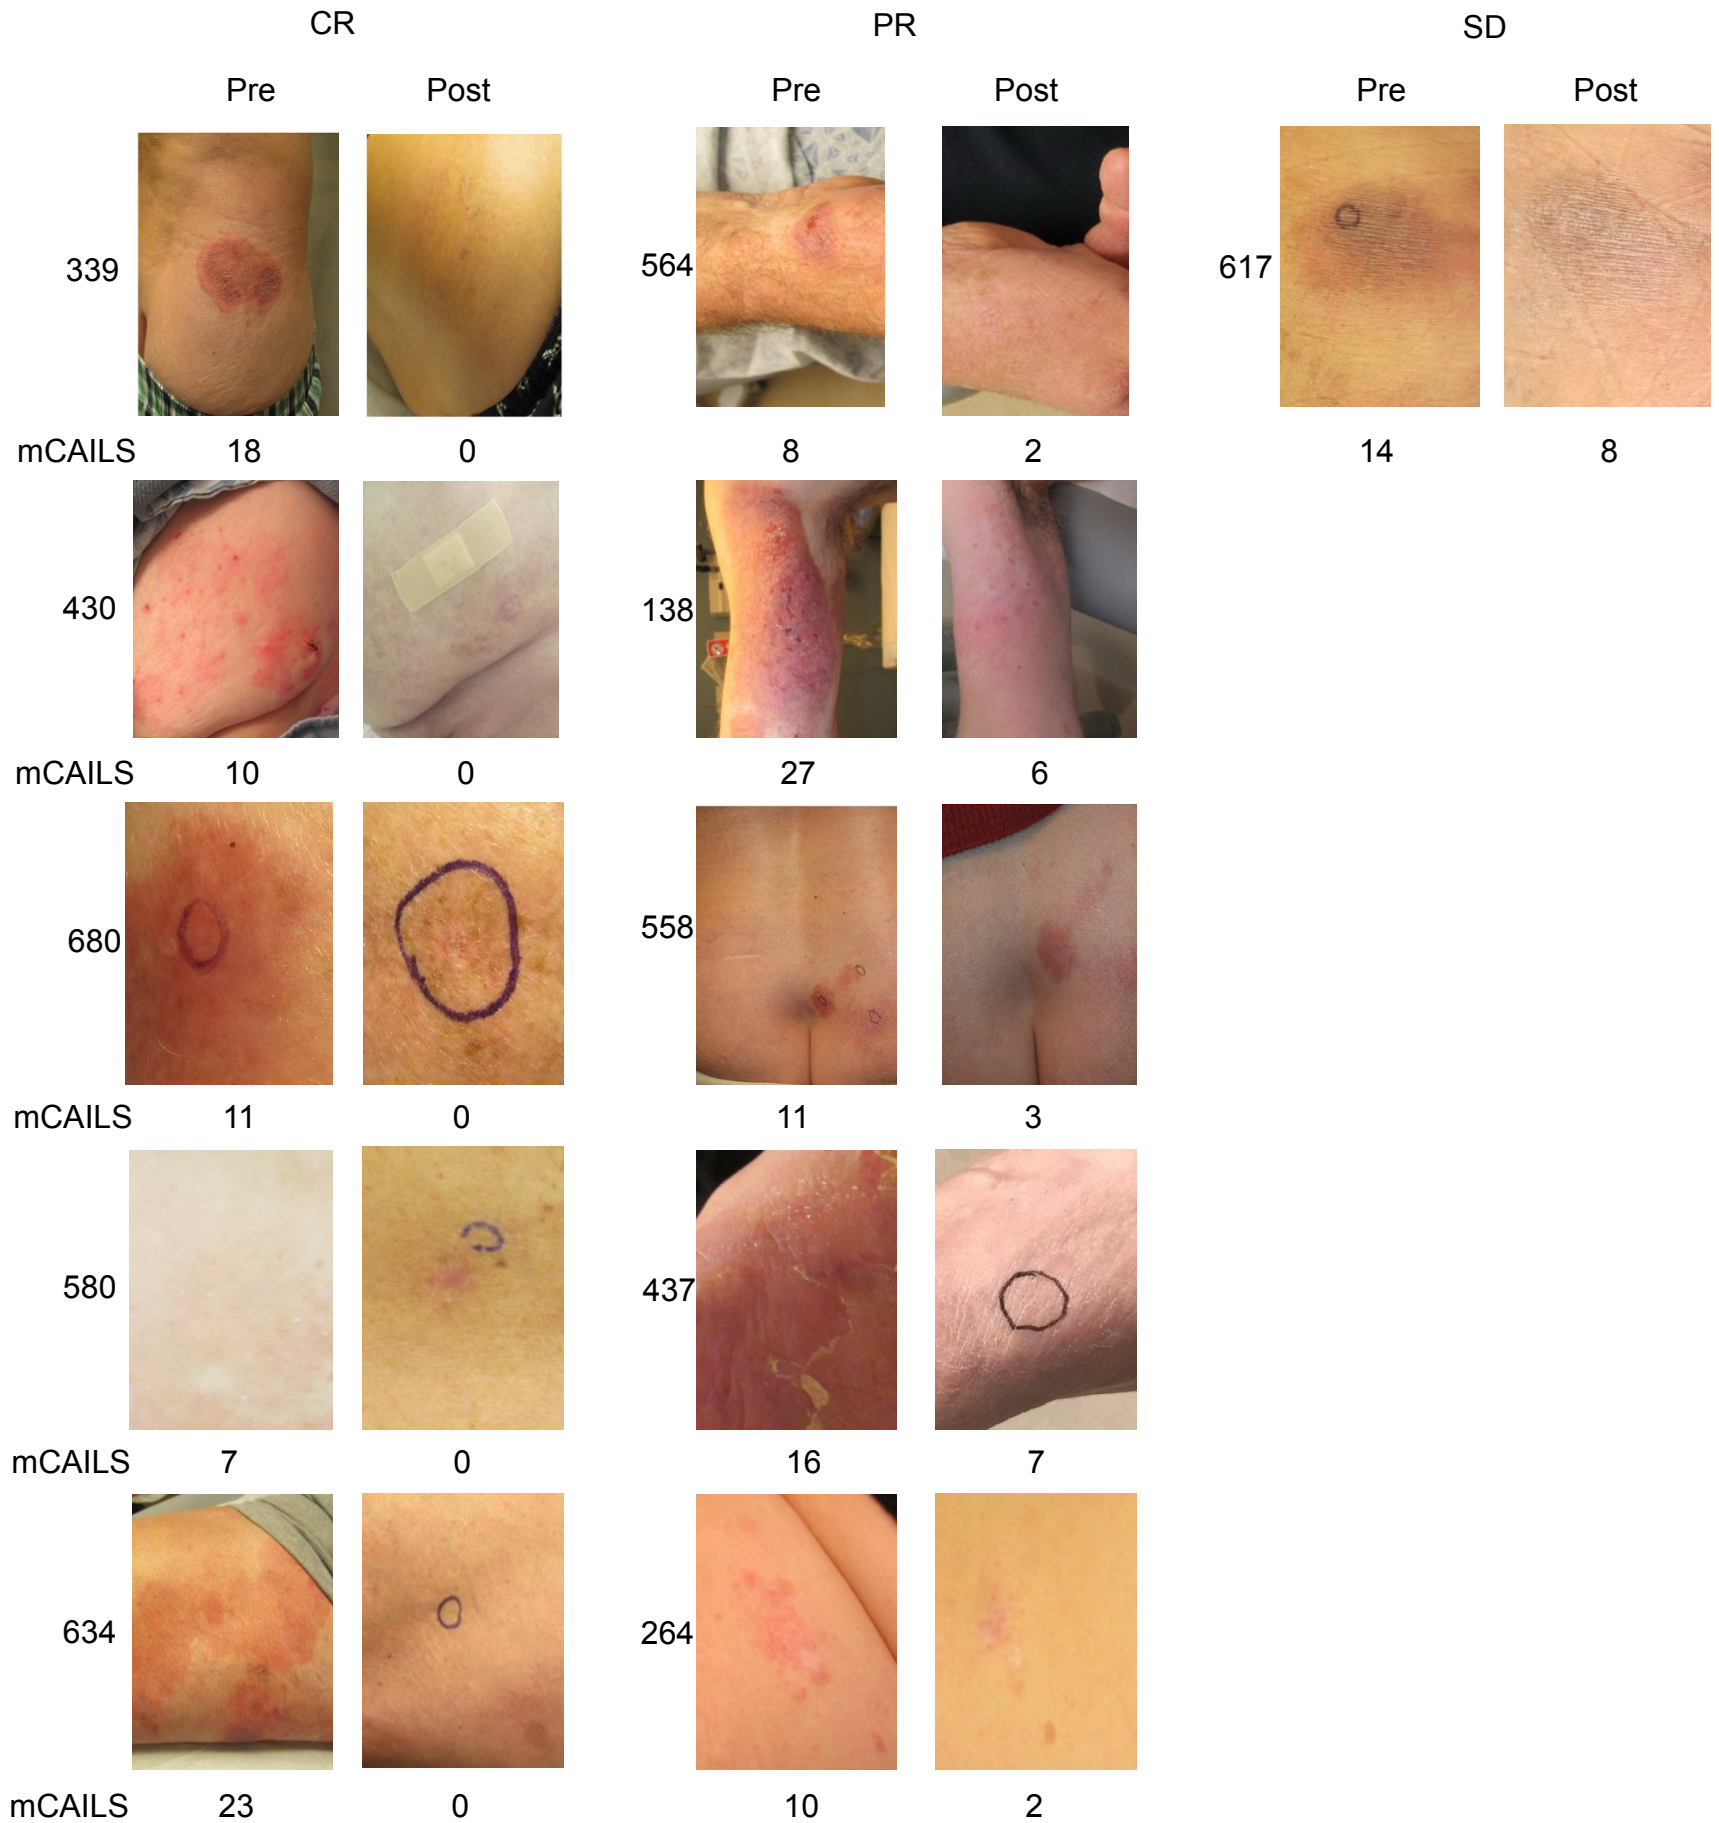

Supplement: NIHMS1541234-supplement-2.pdf [file NIHMS1541234-supplement-2.pdf]
