# Supplementary material
Source: PubMed Central journal article supplement (PMC7122012)

Supplemental Figure 2. Clinical and molecular parameters such as (A) type of treatment received, (B) body site treated, (C) # of failed therapies and (D) # of benign T cells in post-treatment biopsies are not associated with disease recurrence. Numbers in pie charts indicate # of lesions. p-values determined by Fisher's exact test. NS=not significant

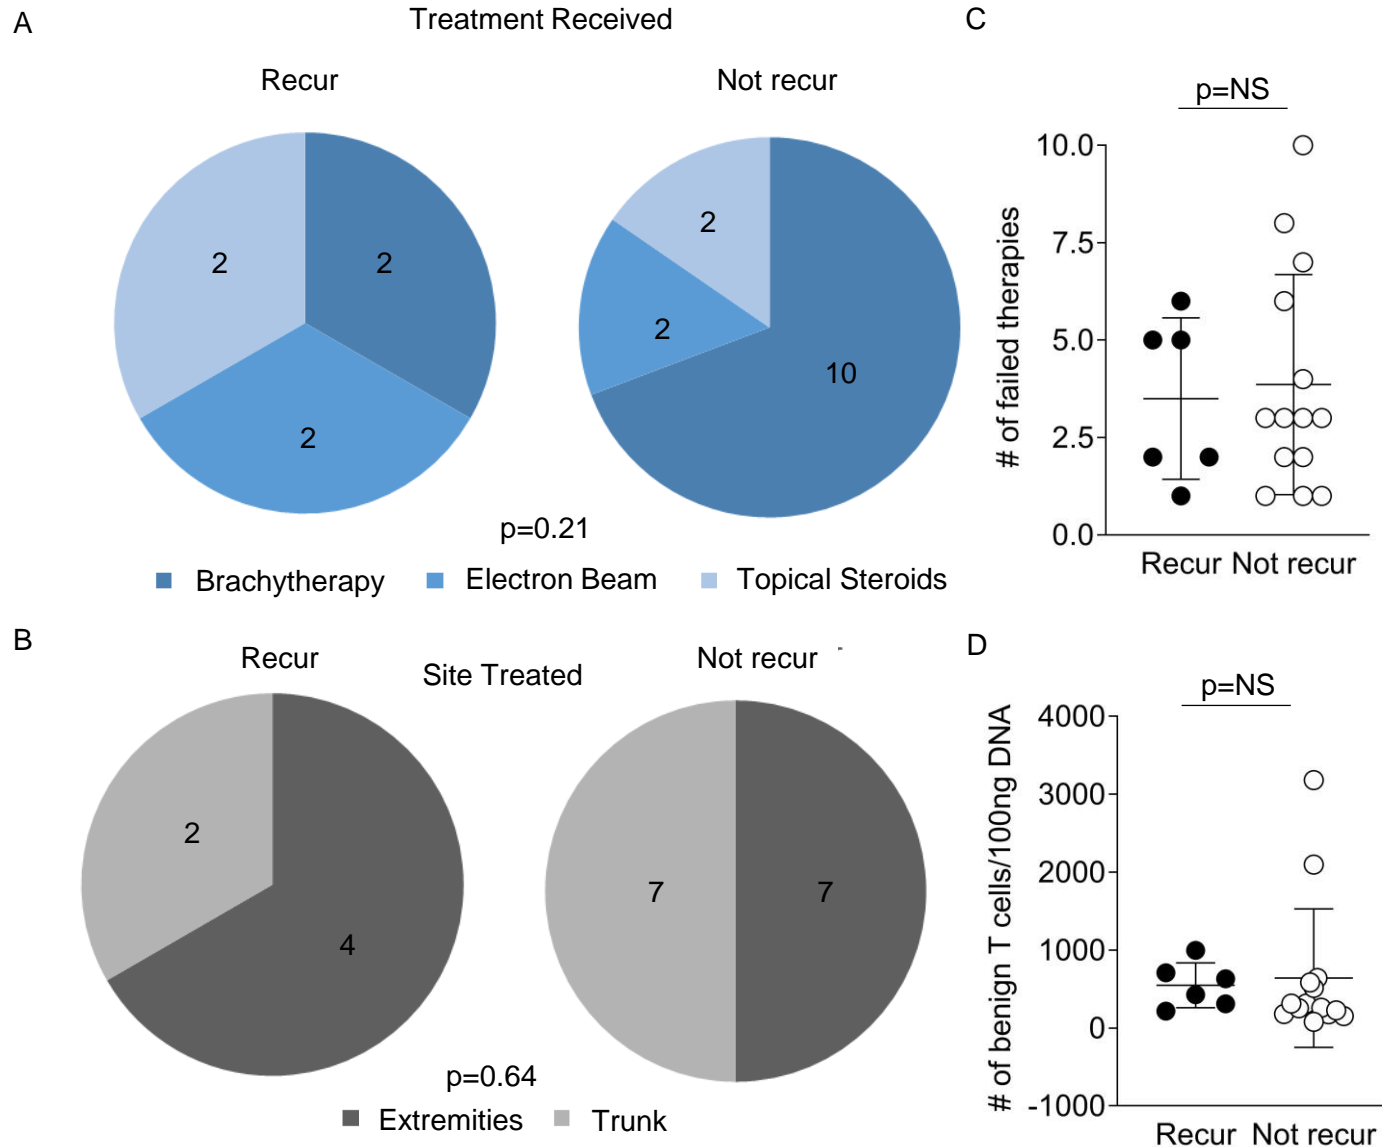

Supplement: NIHMS1541234-supplement-3.pdf [file NIHMS1541234-supplement-3.pdf]
