# Supplementary material
Source: PubMed Central journal article supplement (PMC7122012)

Supplemental Figure 3. Kaplan-Meier estimates of overall survival in 210 patients with early-stage mycosis fungoides according to the use of phototherapy (UVB or PUVA) (left panel, all patients; right panel, high-risk patients with TCF>25%)

A

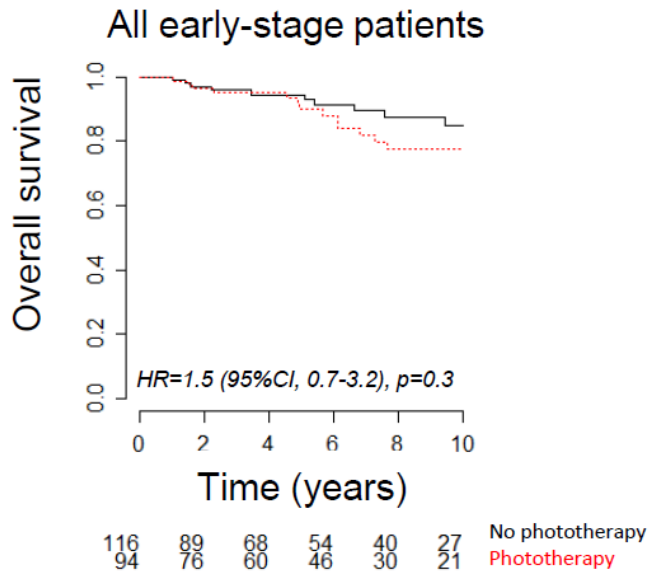

B

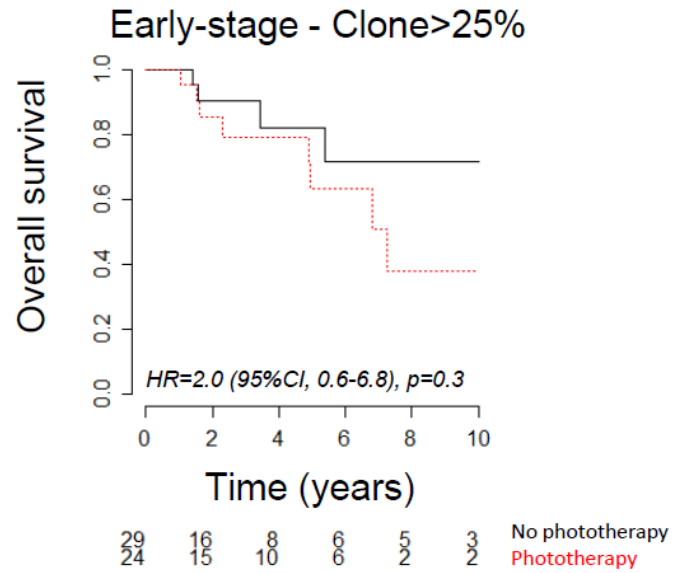

Supplement: NIHMS1541234-supplement-4.pdf [file NIHMS1541234-supplement-4.pdf]
