# Supplementary material
Source: PubMed Central journal article supplement (PMC7122012)

Supplemental Figure 4. Kaplan-Meier analysis of the overall survival of patients who did and did not receive radiation therapy using subgroup analyses examining (A) inclusion of stage IA-IIIB mycosis fungoides patients, (B) Lymphoma-related deaths only, and (C) time of first radiation therapy until censoring/death. Numbers at-risk are indicated at the bottom and curves were compared using the log-rank test,  $p < 0.05$  considered significant.

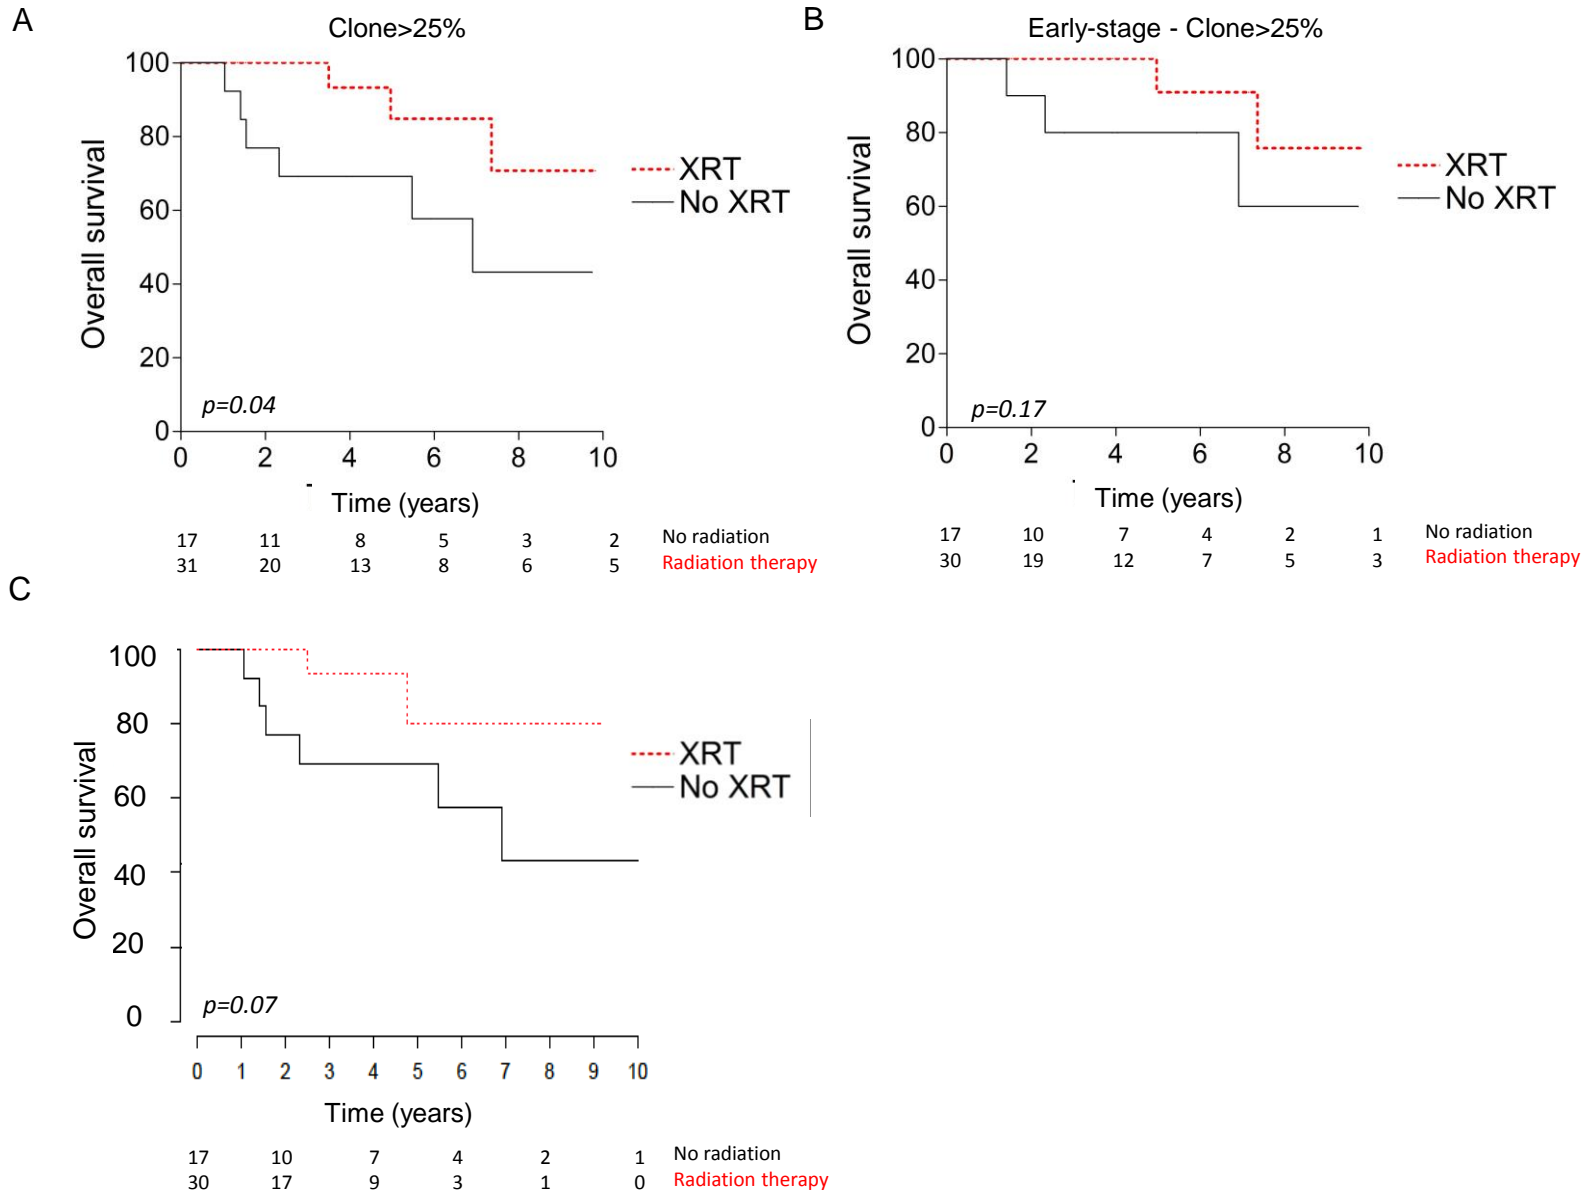

Supplement: NIHMS1541234-supplement-5.pdf [file NIHMS1541234-supplement-5.pdf]
